# Recurrent mobilization of ancestral and novel variants of the chromosomal di-hydrofolate reductase gene drives the emergence of clinical resistance to trimethoprim

## 1.1 Author names

Miquel Sánchez-Osuna<sup>1</sup>, Pilar Cortés<sup>1</sup>, Montserrat Llagostera<sup>1</sup>, Jordi Barbé<sup>1,§</sup> and Ivan Erill<sup>2,§,\*</sup>

Miquel Sánchez-Osuna: [0000-0001-5267-4814]

Pilar Cortés: [0000-0002-5924-0653]

Montserrat Llagostera: [0000-0001-8177-8321]

Jordi Barbé: [0000-0003-4408-013X]

Ivan Erill: [0000-0002-7280-7191]

## 1.2 Affiliation

<sup>1</sup> Departament de Genètica i de Microbiologia, Universitat Autònoma de Barcelona, Bellaterra, Spain

<sup>2</sup> Department of Biological Sciences, University of Maryland, Baltimore County, Baltimore, MD, United States

<sup>§</sup> Co-senior authors

## 1.3 Corresponding author

[erill@umbc.edu](mailto:erill@umbc.edu)

## 1.4 Keyword

trimethoprim, antibiotics, chemotherapeutic agent, resistance, sulfonamides, phylogenetics, evolution

## 28 **2. Abstract**

30 Trimethoprim is a synthetic antibacterial agent that targets folate biosynthesis by competitively  
32 binding to the di-hydrofolate reductase enzyme (DHFR). Trimethoprim is often administered  
34 synergistically with sulfonamide, another chemotherapeutic agent targeting the di-hydro-pterolate  
36 synthase (DHPS) enzyme in the same pathway. Clinical resistance to both drugs is widespread and  
38 mediated by enzyme variants capable of performing their biological function without binding to  
40 these drugs. These mutant enzymes were assumed to have arisen after the discovery of these  
42 synthetic drugs, but recent work has shown that genes conferring resistance to sulfonamide were  
44 present in the bacterial pangenome millions of years ago. Here we apply phylogenetics and  
46 comparative genomics methods to study the largest family of mobile trimethoprim resistance genes  
48 (*dfrA*). We show that most of the *dfrA* genes identified to date map to two large clades that likely  
50 arose from independent mobilization events. In contrast to sulfonamide resistance (*sul*) genes, we  
find evidence of recurrent mobilization in *dfrA* genes. Phylogenetic evidence allows us to identify  
novel *dfrA* genes in the emerging pathogen *Acinetobacter baumannii*, and we confirm their  
resistance phenotype *in vitro*. We also identify a cluster of *dfrA* homologs in cryptic plasmid and  
phage genomes, but we show that these enzymes do not confer resistance to trimethoprim. Our  
methods also allow us to pinpoint the chromosomal origin of previously reported *dfrA* genes, and we  
show that many of these ancient chromosomal genes also confer resistance to trimethoprim. Our  
work reveals that trimethoprim resistance predated the clinical use of this chemotherapeutic agent,  
but that novel mutations have likely also arisen and become mobilized following its widespread use  
within and outside the clinic. This work hence confirms that resistance to novel drugs may already be  
present in the bacterial pangenome, and stresses the importance of rapid mobilization as a  
fundamental element in the emergence and global spread of resistance determinants.

## 52 **3. Impact statement**

54 Antibiotic resistance is a pressing and global phenomenon. It is well-established that resistance to  
56 conventional antibiotics emerged millions of years ago in either antibiotic-producing bacteria or  
58 their competitors. Resistance to synthetic chemotherapeutic agents cannot be explained by this  
60 paradigm, since these drugs are not naturally produced. Resistance is hence assumed to have  
62 evolved rapidly following the clinical introduction of these drugs. Recently we showed that  
64 resistance to one such drug, sulfonamide, evolved not recently, but millions of years ago, suggesting  
66 that the diversity of bacterial genomes may well contain genes conferring resistance to drugs yet to  
be developed. Here we analyze the origin of resistance to trimethoprim, another chemotherapeutic  
agent developed in the 1960's. Using phylogenetic methods, we identify new variants of the  
trimethoprim resistance genes that had not previously been reported, and we trace the  
chromosomal origins for a number of already known resistance variants. Our results show that  
resistance to trimethoprim is very diverse and has originated both from recent mutations and from  
preexisting ancient variants. These results stress the importance of gene mobilization mechanisms as  
the main drivers of the current antibiotic resistance phenomenon.

## 4. Data summary

- 68 - The scripts used for data collection and analysis can be obtained at the GitHub ErillLab repository  
(<https://github.com/ErillLab/>).
- 70 - The Bayesian phylogenetic tree can be visualized online on iTOL  
(<https://itol.embl.de/tree/855674159451585133078>) [1].
- 72 - The authors confirm all other supporting data has been provided within the article or through  
supplementary data files.

74

## 5. Introduction

76 Bacterial resistance to antibacterial agents remains an increasingly challenging and global problem in  
modern healthcare [2, 3]. Bacterial cells display a diverse array of mechanisms to cope with  
78 exposure to antibacterial compounds, including modification or overexpression of the antibacterial  
target, efflux or reduction of antibacterial uptake, and the use of alternate pathways [4]. Constant  
80 exposure to non-lethal concentrations of antibacterial agents may lead to the selection of partial  
resistance to antibiotics over relatively short timespans [5], and this evolution may be hastened by  
82 simultaneous exposure to multiple antibacterials [6]. However, the rapid proliferation of multidrug  
resistant nosocomial pathogens in the last fifty years has not been driven by the independent  
84 evolution of resistance traits, but through the extensive dissemination of mobile genetic elements  
carrying resistance genes [4, 7]. It is widely accepted that most genes conferring resistance to  
86 antibiotics present in pathogenic bacteria were obtained by successive lateral gene transfer of  
homologs that originally evolved in the microbes that produce the antibiotic or in their natural  
88 competitors [7, 8]. The high plasticity of bacterial genomes, enabled by a large repertoire of mobile  
genetic elements, and the availability of a large pool of ancient antibiotic resistance determinants  
90 hence set the stage for the rapid proliferation of antibiotic resistance, giving rise to multi-resistant  
clinical strains just a few years after the commercial introduction of antibiotics [7].

92

Synthetic chemotherapeutic agents predate antibiotics in the clinical setting, and continue to be  
94 used synergistically with antibiotics to treat microbial infections [9]. Following the initial discovery  
and clinical use of arsphenamine in 1907 [10], interest in chemotherapeutic agents quickly took off  
96 after the development of sulfa drugs in the 1930's [11]. The discovery of trimethoprim (a di-  
aminopyrimidine) was received with interest because, like sulfonamides, trimethoprim targets the  
98 bacterial synthesis of tetrahydrofolic acid, which is a necessary cofactor in the synthesis of thymine  
and purines [12]. Sulfonamides are structural analogs of para-aminobenzoic acid (PABA) and inhibit  
100 the synthesis of di-hydropteroate by competing with PABA for binding to the di-hydropteroate  
synthase (DHPS) enzyme, resulting in sulfonamide-bound di-hydropterin [13]. Trimethoprim is a  
102 structural analog of di-hydrofolic acid, derived from di-hydro-pterate. It acts by competitively  
binding to the di-hydrofolate reductase (DHFR) enzyme, and hence inhibiting the production of  
104 tetrahydrofolic acid [13, 14]. Hence, the synergistic use of trimethoprim and sulfonamides was  
expected to have a potent bactericidal effect by producing a serial blockade on the tetrahydrofolic  
106 acid pathway [12, 15].

108 Unlike antibiotics, chemotherapeutic agents are not produced by natural organisms, yet resistance  
110 to these novel drugs arose quickly after their mass-production and it is today pervasive among  
112 clinical isolates [7]. In the case of sulfonamides and trimethoprim, which are usually administered in  
114 tandem, resistance via chromosomal mutations to both chemotherapeutics was reported soon after  
116 their clinical introduction [13]. Chromosomal resistance to sulfonamides can occur through  
118 mutations yielding increased production of PABA [16] or, more commonly, via mutations to the  
120 chromosomal *folP* gene (encoding DHPS), which decrease the affinity of DHPS for sulfonamide  
122 without detriment to PABA binding [13, 17]. Such mutations have been reported in multiple  
124 bacterial groups and target different conserved regions of DHPS [13]. Similarly, chromosomal  
126 resistance to trimethoprim may arise via mutations that increase transcription of the *folA* gene  
128 (encoding DHFR) [18], or through mutations that decrease the affinity of DHFR for trimethoprim  
[13]. The vast majority of resistant clinical isolates to both sulfonamides and trimethoprim, however,  
are not due to chromosomal mutations, but to the acquisition of resistance determinants on mobile  
genetic elements [13]. Parallel to their systematic combined use in both clinical and agricultural  
settings, genes conferring resistance to sulfonamides and trimethoprim are frequently found  
together on mobile elements, such as class 1 integrons [19] or conjugative plasmids [13, 20]. The  
mobile genes conferring resistance to sulfonamide are homologs of the chromosomally-encoded  
*folP* gene and are collectively known as *sul* genes (for *sulfonamide* resistance). Mobile genes  
conferring resistance to trimethoprim are either homologs or functional analogs of the  
chromosomally-encoded *folA* gene and are collectively known as *dfr* genes (for *di-hydrofolate*  
reductase) [17].

130 In spite of their frequent co-occurrence on mobile genetic elements, there are significant differences  
132 between the mobile genes conferring resistance to sulfonamides (*sul* genes) and trimethoprim (*dfr*  
134 genes). To date, only three *sul* gene classes have been described in clinical isolates [21], whereas  
136 more than 30 different *dfr* genes have been reported in clinically-relevant strains [22]. Trimethoprim  
138 resistance (*dfr* genes) have been further classified into two families (*dfrA* and *dfrB*). These two  
140 families encode evolutionarily unrelated proteins of markedly different sizes. Sequence similarity  
142 indicates that *dfrA* genes are homologs of the chromosomally-encoded *folA* genes, whereas *dfrB*  
144 genes are functional analogs of unknown origin [23, 24]. Most *dfrA* genes follow a standard naming  
146 convention consisting of *dfrA* followed by a numerical value indicating their discovery rank order.  
However, several *dfrA* genes first identified in Gram-positive bacteria, and thought at the time to be  
unrelated to the Gram-negative *dfrA* genes, were originally named following an alphabetical  
convention (*dfrC-K*). The disparity in genetic diversity among sulfonamide and trimethoprim mobile  
resistance determinants is suggestive of different evolutionary processes leading to the onset and  
spread of resistance to these two chemotherapeutic agents [13]. It was suggested that resistance to  
sulfonamide had arisen in a few isolated organisms and rapidly spread upon the introduction of sulfa  
drugs, whereas trimethoprim resistance had independently evolved, and had been subsequently  
mobilized, multiple times [13].

148 Recently, we examined the origins of *sul* genes through comparative genomics, phylogenetic analysis  
and *in vitro* assays [25]. We identified a well-defined mutational signature in *sul*-encoded proteins

150 with respect to chromosomally encoded *folP* genes, and we used this conserved motif to map the  
152 origins of *sul* genes in bacterial chromosomes. Our work revealed that the three groups of *sul* genes  
154 identified in clinical isolates originated in the *Leptospiraceae* and were transferred to the  
*Rhodobiaceae* more than 500 million years ago. These two ancient resistant determinants were later  
156 independently mobilized, and rapidly disseminated following the commercial introduction of sulfa  
drugs. By tracing the phylogenetic lineage of *sul* genes and demonstrating that these two bacterial  
158 families were resistant to sulfonamides long before their discovery and clinical use, our work  
indicated that resistance to novel drugs could very well preexist, and be ready for mobilization,  
160 within the vast bacterial pangenome. Here we apply similar methods to examine the phylogenetic  
relationships among *dfrA* and chromosomally-encoded *folA* genes. Our aim is to shed light on the  
162 evolutionary processes giving rise to mobile trimethoprim resistance genes. Our work illustrates  
significant similarities and differences in the processes leading to the emergence and spread of  
164 trimethoprim and sulfonamide resistance determinants, reveals previously unreported clusters of  
*dfrA* genes, and suggests that systematic analyses of the bacterial pangenome may of use in the  
design of novel antibacterials.

## 166 6. Methods

### 6.1 Sequence data collection

168 To identify homologs of DfrA proteins, we first compiled a panel of Dfr proteins reported in the  
literature. Dfr proteins belong to two distinct families of unrelated sequences (DfrA and DfrB; Figure  
170 S1). We mapped these sequences to PFAM models of DfrA (PF00186) and DfrB (PF06442) using  
HMMER (hmmscan), and we discarded sequences mapping to the DfrB family, retaining only DfrA  
172 proteins for analysis (Table S1; Data 1). We further excluded redundant DfrA sequences (identity  
>90%) using T-COFFEE seq\_reformat command [26], and used the resulting non-redundant panel to  
174 identify DfrA homologs in protein records associated with NCBI GenBank/RefSeq sequences  
corresponding to mobile genetic elements. These were defined as sequences containing the  
176 keywords “plasmid”, “integron” or “transposon” in their title, belonging to complete genome  
records [27, 28]. BLASTP hits matching stringent e-value ( $<1e^{-20}$ ) and query coverage (>75%)  
178 thresholds were added to the panel if non-redundant (identity <90% with respect to existing panel  
members), and their classification as mobile elements was validated by assessing that they  
180 contained at least one gene coding for an integrase, transposase or plasmid replication protein, as  
determined by HMMER (hmmscan, e-value $<1e^{-05}$ ) with reference PFAM models (Table S2) [29–33].  
182 To detect putative chromosomally-encoded *folA* genes associated with mobile *dfrA* genes, we used  
the sequences in the extended non-redundant panel of DfrA homologs as queries for TBLASTN  
184 searches against NCBI GenBank complete genomes with stringent e-value ( $<1e^{-40}$ ) and query  
coverage (>75%) settings. Hits with nearby genes annotated as resistance determinants,  
186 transposases or integrases were considered to be chromosomally-integrated mobile DfrA homologs  
and not considered for further analysis. For each mobile DfrA homolog in the panel, the first, if any,  
188 TBLASTN hit satisfying these thresholds was considered, for the purposes of this study, to be a proxy  
for the closest putative chromosomally-encoded Fola protein. The choice of representative DfrA  
190 sequences did not alter the TBLASTN results. To complete the panel of sequences used to  
reconstruct the evolutionary history of DfrA/FolA sequences, we used the non-redundant panel of  
192 mobile DfrA sequences to identify via BLASTP (e-value $<1e^{-20}$ , coverage>75%) Fola proteins encoded

by the chromosomes of NCBI RefSeq representative species for all bacterial orders, and for each  
194 bacterial family in the Proteobacteria. In addition, the closest archaeal homologs of bacterial *FoIA*  
sequences were determined by searching with BLASTP the NCBI protein database, restricted to  
196 Archaea (taxid:2157), with the *Escherichia coli* *FoIA* protein. A member of each family from the order  
(Halobacteriales) of the identified best archaeal hit of *E. coli* *FoIA* was sampled to populate the  
198 outgroup.

## 200 **6.2 Phylogenetic analysis**

For phylogenetic inference, we performed a T-COFFEE multiple sequence alignment of protein  
202 sequences for the complete panel of *DfrA* and *FoIA* homologs, combining three CLUSTALW profile  
alignments with different (5, 10, 25) gap opening penalties and leveraging *E. coli* *FoIA* crystal  
204 structure (POABQ5) to adjust gap penalties [34]. The resulting alignment was processed with Gblocks  
(Allowed Gap Positions: With Half, Minimum Number Of Sequences For A Conserved Position: 86,  
206 Minimum Number Of Sequences For A Flanking Position: 95, Maximum Number Of Contiguous  
Nonconserved Positions: 5, Minimum Length Of A Block: 4) [35]. Bayesian phylogenetic inference on  
208 the trimmed multiple sequence alignment was carried out with MrBayes version 3.2.6 [36]. Four  
Metropolis-Coupled Markov Chain Monte Carlo simulations with four independent chains were run  
210 for 20,000,000 generations, using a mixed four-category gamma distributed rate plus proportion of  
invariable sites model [invgamma] and a JTT (Jones-Taylor-Thornton) amino acid substitution model  
212 [37]. Chains were sampled every 100 iterations and stationarity was analyzed with Tracer [38] by  
monitoring the Estimated Sample Size (ESS). To determine burnin, chain results were summarized  
214 with MrBayes imposing the restriction that ESS be above 200 and that the Potential Scale Reduction  
Factor (PSRF) be within 0.005 of 1. Based on summarization results, the burn-in was set at 20% of  
216 iterations. A consensus tree was generated with the half-compat option and visualized using the  
GGTREE R library [39]. Ancestral state reconstruction of a single binary trait (mobile/chromosomal)  
218 was performed with BayesTraits version 3.0.2 [40]. Known states at tree tips were labeled, and  
ancestral states were reconstructed using the Multistate and Maximum Likelihood (ML) settings.

220

## **6.3 DNA Techniques and In vitro Trimethoprim Susceptibility Assay**

222 With the exception of the *Ralstonia solanacearum* GMI1000 (Marc Valls; Center for Research in  
Agricultural Genomics) and *E. coli* K-12 (CGSC5073) *foIA* genes, which were amplified from genomic  
224 DNA, *dfrA* and *foIA* homologs were adapted to *E. coli* codon usage, synthesized (ATG:biosynthetics  
GmbH) and then subcloned into a dephosphorylated pUA1108 vector [41] using NdeI and BamHI  
226 double digest (New England Biolabs) when possible. Genes with internal restriction sites for any of  
these two enzymes were subcloned into the same vector using the HIFI DNA Assembly kit (New  
228 England Biolabs) following the manufacturer's protocol. Oligonucleotides used in this work are listed  
in Table S3. All constructs were validated by sequencing (Macrogen) prior to their transformation  
230 into *E. coli* K-12 (CGSC5073). The minimal inhibitory concentration (MIC) for trimethoprim (Sigma-  
Aldrich) for strains of *E. coli* K-12 (CGSC5073) carrying different versions of pUA1108 encoding *foIA*  
232 or *dfrA* homologs was determined following the Clinical and Laboratory Standards Institute (CLSI)  
guidelines using microdilution tests in Mueller-Hinton broth (Merck) [42]. All MIC assays were  
234 performed in triplicate. Colonies were grown on Luria-Bertani (LB) agar for 18 h and then suspended

236 in sterile 0.9% NaCl solution to a McFarland 0.5 turbidity level. Suspensions were then diluted at  $10^{-2}$   
238 in Mueller-Hinton (MH) broth, and 50  $\mu$ l ( $5 \times 10^4$  cells) were inoculated onto microtiter plates that  
contained 50  $\mu$ l of MH broth supplemented with 1024–0.250 mg/L of trimethoprim. To determine  
growth, absorbance at 550 nm was measured after 24 h incubation at 37°C. The *dfrA1* gene was  
used as positive control [43] and the *E. coli folA* gene as a negative control [44].

240

#### 6.4 Sequence analysis

242 To assess whether the identified chromosomal gene associated with a mobile *dfrA* gene is the  
canonical *folA* gene for the genus, and not the product of a subsequent recombination of the mobile  
244 *dfrA* gene into the chromosome, we computed the pair-wise amino acid identity among the  
products of all chromosomal *folA* homologs and then compared this distribution with the pair-wise  
246 amino acid identity of the putative origin versus the chromosomal *folA* homologs. We used a one-  
sided Mann-Whitney U test to determine if the two distributions were significantly different. To  
248 analyze the %GC content relationship between *sul/dfrA* genes and their host chromosomes, we used  
pre-compiled panels of sequences for non-redundant Sul [25] and DfrA homologs to search protein  
250 records associated with NCBI GenBank/RefSeq sequences of mobile genetic elements. The %GC  
content of the corresponding *sul* and *dfrA* genes, as well as the overall %GC content in both the  
252 mobile genetic element and the chromosome of the species harboring it, were computed with  
custom Python scripts. To analyze whether mobile *dfrA* genes with %GC content close to their hosts'  
254 genomes are more similar to the hosts' *folA* genes than expected if *dfrA*-host associations were  
arbitrary, we performed a permutation test comparing the mean pairwise alignment distance  
256 between DfrA genes and host-encoded Fola genes. We randomly permuted DfrA-host assignments  
1,000 times and computed the corresponding p-value as the rank of the non-permuted mean  
258 pairwise alignment distance. The input files (Data 2) and scripts (Data 3) used for data collection and  
analysis are available on public repositories.

260

## 7. Results and discussion

### 262 7.1 A large fraction of reported *dfrA* genes share a common evolutionary origin

To explore the phylogenetic relationship of trimethoprim resistance determinants with their  
264 chromosomally-encoded *folA* counterparts, we used a non-redundant panel (<90% pairwise identity)  
of protein sequences encoded by reported *dfr* genes (Table S1) to detect putative DHFR homologs in  
266 sequenced mobile elements. We mapped all these reference sequences to the PFAM models for  
DfrA and DfrB (Table S4) [45]. We discarded sequences associated with the *dfrB* gene family, and  
268 retained for analysis non-redundant sequences mapping to the clades defined by *dfrA* genes  
reported in the Proteobacteria and by *dfrDEFGK* genes associated with Gram-positive bacteria. For  
270 convenience, and in accordance with recent reports on *dfr* nomenclature [46], we hereinafter  
designate these two groups (*dfrA* and *dfrDEFGK*) with the umbrella term *dfrA*. These reference  
272 mobile DfrA homologs were then used to detect putative chromosomally-encoded homologs in  
complete bacterial genomes using TBLASTN. These sequences were combined with Fola homologs  
274 sampled from representative genomes of all bacterial orders with complete genome assemblies, and

of each bacterial family within the Proteobacteria (Table S5; Data 4). The resulting multiple sequence  
276 alignment was used to perform Bayesian phylogenetic analysis of F<sub>o</sub>LA/DfrA sequences.

278 The phylogenetic tree shown in Figure 1 showcases the genetic diversity of *dfrA* genes, which  
encompass sequences with pairwise sequence identities ranging from 99% to 20% (Table S6). The  
280 resulting phylogeny also reveals that the vast majority (70.7%) of known DfrA sequences map to two  
well-supported (>0.8 posterior probability), distinct clades that likely arose from two different  
282 ancestors. The first clade (*Clade 1*), typified by the DfrA1 and DfrA12 proteins [47], includes 22  
sequences encoded by previously reported *dfrA* genes with an average amino acid identity of  
284 51.19% ±SD 17.63%, divided into two subgroups (containing 17 and 5 known *dfrA* genes,  
respectively) and associated with Gammaproteobacteria pathogens. This clade includes also a basal  
286 set of taxa composed of the *Clostridioides difficile dfrF* gene and two newly identified mobile *dfrA*  
homologs also from Firmicutes isolates. The second clade (*Clade 2*), exemplified by DfrA18 [48],  
288 comprises a group of six highly diverged (34.37% ±SD 10.15% average amino acid identity) DfrA  
sequences from Gammaproteobacteria isolates.

290

Analysis of the *dfrA* gene sequences in these two clades reveals an unexpected degree of  
292 heterogeneity in %GC content. In the first clade, several *dfrA* homologs, including the *C. difficile dfrF*  
gene, show relatively low %GC content (Figure 1 inner ring), matching the Firmicutes species they  
294 were reported on (Figure 1 outer ring; Table S7). Similarly, *dfrA* genes in the *dfrA12* group show a  
%GC content (53.28 ±SD 1.80) that is well in line with that of the *Enterobacteriaceae* isolates  
296 harboring them. Conversely, the largest group in this clade, encompassing *dfrA1*, *dfrA7* and *dfrA14*,  
shows a mean %GC content of 41.03 ±SD 3.99, which is substantially lower than the average %GC  
298 content of the *Enterobacteriaceae* harboring these mobile elements. The same holds true for the  
second clade (*dfrA18*), which also shows lower %GC content (43.88 ±SD 4.91) than expected for the  
300 *Enterobacteriaceae*. To ascertain whether this pattern of %GC heterogeneity extended to other  
previously reported and putative *dfrA* genes, we examined the %GC content of *dfrA* (935) and *sul*  
302 (408) gene homologs identified in this analysis with respect to the genome %GC content of the host  
species harboring these mobile resistance genes.

304

The results shown in Figure 2 (top panel) and Table S8 (Data 5) reveal that *dfrA* genes tend to align  
306 with host genome %GC content (Pearson  $\rho=0.56$ ), whereas *sul* genes display a two-tiered  
distribution of %GC content that is essentially independent of host genome %GC (Pearson  $\rho=0.14$ ).  
308 Available *dfrA* and *sul* sequences are dominated by variants of a known *dfrA* and *sul* genes that have  
been isolated predominantly in a select group of bacterial hosts (Figure 2; bottom panel). To correct  
310 for this skew, we filtered *dfrA* sequences based on the amino acid identity (<90%) of their encoded  
proteins. This filtering resulted in a significantly smaller number of non-redundant representative  
312 *dfrA* (63) and *sul* (4) genes (Table S9). The four representative *sul* genes correspond to one exemplar  
of the *sul1* and *sul2* families, and two exemplars of the *sul3* family. Among representative *dfrA*  
314 genes, fourteen map to the first clade (*Clade 1*) of Figure 1 and four to the second clade (*Clade 2*).  
The correlation of *dfrA* genes with host genome %GC increases significantly (Pearson  $\rho=0.78$ ) when  
316 considering only non-redundant representative *dfrA* sequences. The fact that the %GC content of



representative *dfrA* sequences aligns well with their host genome %GC could suggest that %GC  
318 content in *dfrA* genes has been ameliorated to match the host's. Alternatively, it could indicate that  
320 the mobile *dfrA* gene originated via mobilization of a chromosomal *folA* gene from a bacterium in  
322 the same clade as the current host. The later scenario posits that, besides %GC content similarity,  
324 representative *dfrA* genes should also encode proteins with significant sequence similarity to their  
hosts' F<sub>olA</sub> protein. We performed a permutation test to analyze whether representative *dfrA* gene  
products show significant similarity with their hosts' F<sub>olA</sub> protein (Table S10). Our results indicate  
that this is the case ( $p < 0.001$ ), suggesting that most mobile *dfrA* genes are still associated with  
species from the same clade they originated in.

326

The filtering of *dfrA* sequences based on amino acid identity generates three large clusters  
328 (represented by *dfrA12*, *dfrA5* and *dfrA1*, and belonging to *Clade 1* from Figure 1) containing more  
than 100 genes with identity larger than 90%. The *dfrA* genes in these clusters show a distribution of  
330 %GC content that is essentially independent of the host genome %GC, as in the case of *sul* genes  
(Figure 2; top panel), and their products show no significant sequence similarity with the hosts' F<sub>olA</sub>  
332 (permutation test  $p > 0.1$ ). This indicates that the *dfrA* genes in these large clusters have spread  
across distantly related bacterial clades, primarily through their association with *sul*-containing  
334 integron-based transposable elements that are widely disseminated among clinically relevant  
bacteria [49, 50]. This analysis also brings to the fore the presence of multiple *dfrA* cluster  
336 representatives, with widely divergent %GC, on narrow bands of host genome %GC content. These  
bands correspond to *E. coli* (50.7% GC) and *Klebsiella pneumoniae* (57.4% GC) isolates, which are  
338 heavily oversampled in the dataset (Figure 2, bottom panel). The marked divergence in %GC content  
(*E. coli*:  $9.55\% \pm \text{SD } 6.15\%$ , *K. pneumoniae*:  $6.93\% \pm \text{SD } 4.63\%$ ) and amino acid sequence identity (*E.*  
340 *coli*:  $38.57\% \pm \text{SD } 15.24\%$ , *K. pneumoniae*:  $38.39\% \pm \text{SD } 14.02\%$ ; Table S11; Figure S2) among these  
representative *dfrA* genes suggests that they originated via mobilization from a diverse set of  
342 chromosomal backgrounds.

344 The fact that the %GC of *dfrA* genes aligns with their host genome's %GC and that DfrA proteins  
display higher sequence identity when aligned to their host genome F<sub>olA</sub> proteins than to other F<sub>olA</sub>  
346 proteins strongly supports the notion that *dfrA* genes have been mobilized multiple times within  
different bacterial clades [13]. In a few instances, typified by the large *dfrA* clusters illustrated in  
348 Figure 2, *dfrA* genes have been captured by highly efficient mobile elements and dispersed widely  
across unrelated groups of bacteria [49]. These mobile elements often harbor *sul* genes, which also  
350 display a host-independent %GC distribution. Many of the *dfrA* genes identified here are associated  
with clinical isolates. The divergent %GC content and amino acid identity of these *dfrA* genes  
352 indicates that pathogenic bacteria have obtained *dfrA* genes on multiple occasions and from  
different sources, highlighting the ability of mobilized resistance determinants to reach clinically-  
354 relevant pathogens [17, 51].

## 356 **7.2 Novel trimethoprim resistance determinants of *Acinetobacter* clinical isolates** 357 **identified through phylogenetic methods**

358 The phylogenetic tree in Figure 1 includes reported DfrA proteins and their putative homologs, as  
359 well as FolaA proteins identified via TBLASTN as putative DfrA homologs or sampled uniformly across  
360 bacterial clades. The inferred phylogeny also reveals several groups of previously unreported mobile  
361 DHFR homologs that form well-supported clades in association with chromosomal FolaA proteins.  
362 These FolaA proteins could hence constitute the chromosomal origins of the associated mobile DHFR  
363 homologs, and provide insights into the emergence and dissemination of trimethoprim resistance  
364 genes. To determine whether these mobile DHFR homologs did confer resistance to trimethoprim,  
365 we cloned a subset of the genes encoding them and we performed broth microdilution assays to  
366 determine the minimal inhibitory concentration (MIC) of trimethoprim. The results, shown in Table  
367 1, reveal that most of the mobile DHFR homologs identified here do confer significant resistance to  
368 trimethoprim. The sole exception is AQW32254. Close inspection revealed that this DHFR homolog is  
369 encoded by a megaplasmid (1.2 Mb) from a *Ralstonia* isolate, and that this is the only DHFR homolog  
370 present in its complete genome. We hence determined that this DHFR homolog was a bona fide FolaA  
371 protein and not a mobile DHFR homolog, and we did not consider as putative *dfrA* genes all other  
372 DHFR homologs identified in megaplasmids (> 400 kbp).

374 Two remaining clades of novel mobile DHFR homologs from clinically-relevant bacteria associated  
375 with chromosomal FolaA proteins were shown to confer resistance to trimethoprim on *E. coli* (Table  
376 1). To investigate whether the sequence determinants conferring resistance had originated in the  
377 associated chromosomal background, we cloned the most closely related chromosomal *folA* gene as  
378 well as gene encoding an additional DHFR homolog from the same genus and performed broth  
379 microdilution assays to determine the MIC of trimethoprim. We also performed ancestral state  
380 reconstruction of the molecule encoding the DHFR homologs (chromosomal/mobile trait) (Table  
381 S12). The combined results of Table 1 and Figure 1 reveal different patterns of trimethoprim  
382 resistance acquisition. KMV08986 is a DHFR homolog harbored by a conjugative plasmid from an  
383 *Acinetobacter baumannii* clinical isolate. Its most closely related chromosomally-encoded DHFR  
384 homolog is the FolaA protein of *Flavobacterium branchiophilum*, which confers resistance to  
385 trimethoprim (Table 1).

386  
387 To ascertain whether this chromosomally-encoded DHFR homolog was encoded by a bona fide *folA*  
388 gene, instead of a mobile *dfrA* gene that integrated into the chromosome, we compared the genus-  
389 wide distribution of pairwise alignment distances between FolaA proteins to the pairwise distance of  
390 the identified homolog versus all other FolaA proteins in the genus. The *F. branchiophilum* FolaA  
391 sequence is significantly different from other *Flavobacterium* FolaA sequences (Mann Whitney U  
392  $p < 0.05$ ; Table S13), raising the possibility that this chromosomal gene could be in fact a recombined  
393 mobile *dfrA* gene. However, phylogenetic analysis with a broader representation of *Flavobacterium*  
394 sequences (Figure S3) confirms the well-supported branching of *F. branchiophilum* FolaA with other  
395 *Flavobacterium* species FolaA proteins, and comparative genomics analysis reveals that the genetic  
396 neighborhood of the chromosomal *folA* gene is conserved in the *Flavobacterium* genus (Figure S4).  
397 Furthermore, the FolaA protein of a prototypical genus member, *Flavobacterium faecale*, also confers  
398 resistance to trimethoprim on *E. coli* (Table 1). These results indicate that the FolaA protein was likely

400 resistant to trimethoprim in the ancestor of extant *Flavobacterium* species, which diverged more  
402 than 50 million years ago [52]. The branching of KMV08986 in the reconstructed phylogeny and the  
associated ancestral state reconstruction indicates that this mobile DHFR homolog likely originated  
via mobilization of a chromosomal *folA* gene within the Bacteroidetes phylum. The encoded Fola  
protein was likely resistant to trimethoprim, but the exact donor species remains to be elucidated.

404

In contrast to *Flavobacterium* proteins, the *Acinetobacter schindleri* Fola protein does not confer  
406 resistance to trimethoprim, in agreement with previous reports of *A. schindleri* susceptibility to  
trimethoprim [53], and with the well-established susceptibility of *A. baumannii* Fola to trimethoprim  
408 [54, 55]. The *A. schindleri* Fola protein is closely related to three mobile DHFR homologs conferring  
resistance to trimethoprim and harbored by *A. baumannii* (WP\_031380727, WP\_034702334) and  
410 *Acinetobacter defluvii* (WP\_004729503) clinical and environmental isolates. These mobile DHFR  
homologs branch within a well-supported clade of chromosomal *Acinetobacter* Fola proteins, as  
412 supported by ancestral state reconstruction (Figure 1; Table S12). The trimethoprim susceptibility of  
*Acinetobacter* chromosomal *folA* genes and the phylogenetic placement of these DHFR homologs  
414 hence indicates that the observed resistance to trimethoprim was acquired immediately prior to or  
after mobilization from an *Acinetobacter* chromosomal background. This is supported by the  
416 observation that these mobile DHFR homologs confer different levels of resistance to trimethoprim  
(Table 1), and that the largest MIC correlates with the location of the DHFR homolog on a plasmid  
418 harboring multiple antibiotic resistance determinants (Figure S5). This suggests that these DHFR  
homologs have acquired mutations conferring heightened resistance to trimethoprim in parallel to  
420 their broader dissemination on multi-resistant mobile elements. Based on their validated  
trimethoprim resistance phenotype and their level of sequence identity versus previously reported  
422 DfrA proteins (<95%; Table S14) [13], we propose to designate these *Acinetobacter* DHFR homologs  
as DfrA38 (KMV08986), DfrA39 (WP\_031380727), DfrA40 (WP\_034702334) and DfrA41  
424 (WP\_004729503).

426 Here we report the identification of trimethoprim susceptible chromosomal *folA* genes that are  
closely related to mobile *dfrA* genes, as well as the discovery of chromosomally-encoded *folA* genes  
428 conferring resistance to trimethoprim. This indicates that, in contrast to sulfonamides [25],  
trimethoprim resistance mutations with small or negligible fitness cost must occur frequently  
430 enough in natural environments. These *folA* variants can then be selected for and mobilized upon  
exposure to trimethoprim. It is well-documented that resistance to trimethoprim, mediated by  
432 mutations on the chromosomal *folA* gene, develops very rapidly and in a fairly structured way [56–  
58], whereas resistance to sulfonamides takes much longer to evolve in a laboratory setting.  
434 Moreover, sulfonamide resistant mutants typically show significantly reduced affinity to PABA. This  
results in a net fitness cost in the absence of sulfonamide that is only palliated by the emergence of  
436 subsequent compensatory mutations [59, 60]. Beyond structural constraints on the respective  
binding pockets, a crucial difference between both chemotherapeutic agents lies in their respective  
438 targets. While trimethoprim directly inhibits DHFR, sulfonamides compete with PABA for access to  
DHPS, yielding a non-productive sulfonamide-bound di-hydropterin. For sulfonamides, therefore, it  
440 is the PABA-to-sulfonamide ratio that limits the production of di-hydropteroate from a limited pool  
of pteridine di-phosphate, and this cannot be altered via overexpression of DHPS [61]. Conversely,

442 trimethoprim overexpression can provide partial resistance to trimethoprim, and mutations  
444 enhancing DHFR expression have been reported to be the first to appear in directed evolution  
446 experiments [58]. The ability to obtain partial resistance through overexpression may hence provide  
448 a stepping stone for the gradual accumulation and refinement of mutations conferring substantial  
450 resistance with little fitness cost, and hence facilitate the development of trimethoprim resistance  
452 [57, 58].

### 7.3 Trimethoprim resistance in chromosomally-encoded *folA* genes

450 Besides uncovering novel *dfrA* genes, the phylogenetic analysis in Figure 1 also identifies several  
452 chromosomal *folA* genes associated with previously reported *dfrA* genes. Two of these chromosomal  
454 *folA* genes have already been reported in the literature as putative origins of *dfrA* genes, and their  
456 identification here provides some degree of validation for the phylogenetic approach implemented  
458 in this work. The putative chromosomal origin for *Staphylococcus aureus* Tn4003 S1-DHFR has been  
460 identified as the chromosomally-encoded *dfrC* gene (*Staphylococcus epidermidis*) and reported to be  
462 susceptible to trimethoprim [62]. The *Enterococcus faecalis* *dfrE* gene, identical to the  
464 chromosomally-encoded *folA* gene of *E. faecalis*, was reported to confer moderate resistance to  
466 trimethoprim in *E. coli*, but only when cloned in a multicopy plasmid, which could easily result in  
468 overexpression-mediated resistance [61, 63].

460 To ascertain whether the chromosomal *folA* genes found here to be associated with other known  
462 *dfrA* genes (*dfrA20*, *dfrA26* and the *dfrDGK* cluster) confer resistance to trimethoprim, we performed  
464 broth microdilution assays to determine the MIC of trimethoprim on these chromosomally-encoded  
466 *FolA* proteins and on another *FolA* protein from the same genus. In all cases, both related *FolA*  
468 proteins confer resistance to trimethoprim (Table 1). The most closely associated chromosomal *folA*  
470 genes are not significantly different from other *folA* genes in their respective genera (Mann Whitney  
472 U  $p > 0.05$ ; Table S13), as reflected also by substantial conservation of the *folA* genomic neighborhood  
474 (Figure S4). Together, these data indicate that resistance to trimethoprim was present on the  
476 ancestor of these genera. The *dfrA26* gene was identified on a *K. pneumoniae* clinical isolate and its  
478 most closely associated chromosomal *folA* gene is a member of the *Alcanivorax* genus. The  
480 branching pattern of *dfrA26* within this clade and ancestral state reconstruction results (Figure 1;  
482 Table S12) suggest that it arose via mobilization of a chromosomal *folA* gene from the *Alcalinivorax*  
484 genus. The *dfrDGK* genes have been reported, respectively, in *E. faecalis*, *Enterococcus faecium* and  
486 *S. aureus*, and ancestral state reconstruction results indicate that these mobile *dfrA* genes originated  
488 through mobilization of a member of closely-related the *Bacillus* genus, members of which have  
490 been reported to be naturally resistant to trimethoprim [64]. In both cases, therefore, the  
492 phylogenetic evidence and the similarity in %GC content among chromosomal and mobile genes  
494 (Figure 1, Table S15) point towards a mobilization event that has to date remained circumscribed to  
496 related genera. Conversely, the *dfrA20* gene was identified on *Pasteurella multocida* isolate, yet the  
498 chromosomal *folA* gene most closely associated to it is encoded by *Fluviicola taffensis*, a  
500 Bacteroidetes, hence suggesting a much more distant mobilization event (Figure 1, Table S15). In all  
502 three cases, however, we find evidence that preexisting resistant *folA* genes can be readily mobilized  
504 from both close (e.g. *dfrDGK*) or distant (e.g. *dfrA20*) species.

484

The resistance to trimethoprim reported here for the chromosomal *folA* genes of two different  
486 genera of Bacteroidetes, two distinct *Alcanivorax* species and a *Bacillus* strain underscores the deep  
ancestry of chromosomal mutations yielding resistance to trimethoprim. The *folA* genes of  
488 *Flavobacterium* and *Fluviicola* were shown here to confer resistance to trimethoprim. These two  
genera are thought to have diverged more than 500 million years and define major lineages within  
490 the Flavobacteriales, suggesting that resistance to trimethoprim emerged in an ancestor of this  
bacterial order. It is worth noting that several of the chromosomal *folA* genes shown here to be  
492 associated with mobile DHFR homologs (*Alcanivorax*, *Flavobacterium* and *Fluviicola*) appear to be  
resistant at the genus level and correspond to genera of aquatic bacteria. This parallels our recent  
494 identification of soil and subterranean water bacteria as the likely originators of clinical sulfonamide  
resistance genes [25], and suggests that the intensive use of trimethoprim/sulfamethoxazole in  
496 agriculture, aquaculture and animal husbandry in the last fifty years may have acted as a trigger for  
the selection and mobilization of preexisting *folA* and *folP* genes conferring resistance to  
498 trimethoprim and sulfonamides. Conversely, trimethoprim susceptible chromosomal *folA* genes  
found here to be associated with *dfrA* genes belong to clinically-relevant genera (*Staphylococcus* and  
500 *Acinetobacter*) that may have been under more direct trimethoprim pressure. This suggests that  
among relatively isolated bacterial populations frequent exposure to high levels of trimethoprim  
502 may trigger the mobilization of spontaneous *folA* mutants, whereas longer term exposure to sub-  
lethal doses of trimethoprim in ecological rich habitats might instead rely predominantly on the  
504 mobilization of naturally resistant *folA* genes (Figure 3).

#### 506 **7.4 Phage-encoded *folA* genes do not confer resistance to trimethoprim**

Our phylogenetic analysis also identifies a well-defined clade of *Enterobacteriaceae* cryptic plasmids  
508 derived from *Salmonella phage* SSU5 and encoding DHFR homologs [65–68]. Genes coding for DHFR  
homologs occur frequently in many bacteriophage families, often in tandem with thymidylate  
510 synthase genes [69], but their functional role has not been fully elucidated. We performed broth  
microdilution assays to determine the MIC of trimethoprim of *E. coli* O104:H4 DHFR (AFS59762). This  
512 phage-encoded DHFR does not confer resistance to trimethoprim (Table 1). The high sequence  
identity and neighborhood conservation among the DHFR enzymes encoded by these  
514 *Enterobacteriaceae* cryptic plasmids and phages (Table S16, Figure S4) therefore suggests that all  
these DHFR enzymes are susceptible to trimethoprim.

516

Bacteriophages can transfer substantial amounts of genetic material via generalized transduction,  
518 and their potential as reservoirs of antibiotic resistance determinants has gained increased attention  
with the advent of metagenomics [70, 71]. However, recent studies have shown that many potential  
520 resistant determinants encoded by phages do not confer resistance against their putative targets.  
Furthermore, only a small proportion of complete phage genomes contain putative antibiotic  
522 resistance genes [72]. Enzymes participating in the folate biosynthesis pathway, however, are  
relatively frequent in phage genomes. These include homologs of the *folP* gene encoding DHPS, of  
524 the *thyX* gene encoding flavin-dependent thymidylate synthase [73–75] and, predominantly,

526 homologs of the *folA* gene encoding DHFR often found in tandem with the *thyA* gene encoding type  
1 thymidylate synthase [69].

528 Early work on *Enterobacteria* phage T4 showed that the phage-encoded *thyA* and *folA* gene products  
530 are functional and participate also in the phage baseplate structure [76], and *thyX* has been shown  
to be functional in a number of phages [73–75]. It has been proposed that these genes help  
532 bacteriophages overcome shortages in the deoxynucleotide pool during replication, but their  
potential in conferring resistance to sulfonamides or trimethoprim remains largely unexplored. The  
534 detection here of DHFR homologs in *Enterobacteriaceae* cryptic plasmids and phages, and the  
subsequent assessment of their trimethoprim susceptibility, reinforces the notion that these genes  
536 have been functionally co-opted by phages principally for deoxynucleotide synthesis. Nonetheless,  
these genes may still confer partial trimethoprim resistance as a byproduct of *folA* overexpression,  
as recently reported for *Stenotrophomonas maltophilia* phage DLP4 [77].

538

## 7.5 Conclusions

540 Recent work has shown that resistance to sulfonamide, a synthetic chemotherapeutic agent, can be  
present in the bacterial pangenome well before their discovery. Here we have used a combination of  
542 *in silico* and *in vitro* techniques to identify novel trimethoprim resistance genes and to identify  
chromosomal *folA* genes that are strongly associated with novel and previously reported *dfrA* genes.  
544 We find that most of the chromosomal *folA* genes associated with mobile *dfrA* genes confer  
resistance to trimethoprim, but we detect cases of novel mutations being rapidly mobilized. Our  
546 work hence shows that the observations from sulfonamide resistance extend to trimethoprim, with  
generalized chromosomal resistance determinants predating the origin of several genera and several  
548 clusters of resistance genes disseminated broadly among clinical isolates. Moreover, this work also  
reveals that, unlike sulfonamides, resistance to trimethoprim is relatively easy to generate and  
550 frequently associated with species from the same clade it originated in. The identification of ancient  
resistance determinants for two synthetic chemotherapeutic agents strongly suggests that  
552 resistance to any novel drugs is likely to be already present in the bacterial pangenome. Systematic  
screening of existing natural variants could therefore provide the means to preemptively identify  
554 derivatives presenting widely-distributed natural resistance determinants and, conversely, to  
engineer derivatives that circumvent most, if not all, natural resistant variants.

556

## 8. Author statements

### 558 8.1 Authors and contributors

Conceptualization, JB, IE; data curation, MS-O, IE; formal analysis, MS-O, IE; funding acquisition, ML,  
560 JB; investigation, MS-O, PC, IE; methodology, ML, JB, IE; project administration, PC, ML, JB, IE;  
resources, PC, ML, JB; software, MS-O, IE; supervision, PC, JB, IE; visualization, MS-O, IE; manuscript  
562 preparation – original draft, MS-O, IE; manuscript preparation – review and editing, MS-O, PC, ML,  
JB, IE.

564

## 8.2 Conflicts of interest

566 The authors declare that there are no conflicts of interest.

## 568 8.3 Funding information

This work was supported by grant BIO2016-77011-R from the Spanish Ministerio de Economía y Competitividad to JB. MS-O was the recipient of a predoctoral fellowship from the Ministerio de Educación, Cultura y Deporte de España.

572

## 8.4 Acknowledgements

574 The authors wish to thank Joan Ruiz and Susana Escribano for their technical support during some of the experimental procedures, as well as Ángela Martínez-Mateos for her continued support. The authors also express their gratitude to Dr. Marc Valls for kindly providing the *R. solanacearum* GMI1000 strain.

578

## 9. References

- 580 1. **Letunic I, Bork P.** Interactive Tree Of Life (iTOL) v4: recent updates and new developments. *Nucleic Acids Res* 2019;47:W256–W259.
- 582 2. **Carlet J, Rambaud C, Pulcini C.** Save Antibiotics: a call for action of the World Alliance Against Antibiotic Resistance (WAAAR). *BMC Infectious Diseases* 2014;14:436.
- 584 3. **Rossolini GM, Arena F, Pecile P, Pollini S.** Update on the antibiotic resistance crisis. *Curr Opin Pharmacol* 2014;18:56–60.
- 586 4. **Davies J, Davies D.** Origins and Evolution of Antibiotic Resistance. *Microbiol Mol Biol Rev* 2010;74:417–433.
- 588 5. **Baym M, Lieberman TD, Kelsic ED, Chait R, Gross R, et al.** Spatiotemporal microbial evolution on antibiotic landscapes. *Science* 2016;353:1147–1151.
- 590 6. **Hegreness M, Shores N, Damian D, Hartl D, Kishony R.** Accelerated evolution of resistance in multidrug environments. *PNAS* 2008;105:13977–13981.
- 592 7. **Aminov RI, Mackie RI.** Evolution and ecology of antibiotic resistance genes. *FEMS Microbiology Letters* 2007;271:147–161.
- 594 8. **Sengupta S, Chattopadhyay MK, Grossart H-P.** The multifaceted roles of antibiotics and antibiotic resistance in nature. *Front Microbiol*;4. Epub ahead of print 2013. DOI: 10.3389/fmicb.2013.00047.
- 596

- 598 9. **Kmeid JG, Youssef MM, Kanafani ZA, Kanj SS.** Combination therapy for Gram-negative bacteria: what is the evidence? *Expert Rev Anti Infect Ther* 2013;11:1355–1362.
- 600 10. **Williams K.** The introduction of ‘chemotherapy’ using arsphenamine – the first magic bullet. *J R Soc Med* 2009;102:343–348.
- 602 11. **Aminov RI.** A Brief History of the Antibiotic Era: Lessons Learned and Challenges for the Future. *Front Microbiol*;1. Epub ahead of print 8 December 2010. DOI: 10.3389/fmicb.2010.00134.
- 604 12. **Masters PA, O’Bryan TA, Zurlo J, Miller DQ, Joshi N.** Trimethoprim-Sulfamethoxazole Revisited. *Arch Intern Med* 2003;163:402–410.
- 606 13. **Sköld O.** Resistance to trimethoprim and sulfonamides. *Vet Res* 2001;32:261–273.
- 608 14. **Quinlivan EP, McPartlin J, Weir DG, Scott J.** Mechanism of the antimicrobial drug trimethoprim revisited. *FASEB J* 2000;14:2519–2524.
- 610 15. **Hitchings GH.** Mechanism of Action of Trimethoprim-Sulfamethoxazole—I. *J Infect Dis* 1973;128:S433–S436.
- 612 16. **Landy M, Larkum NW, Oswald EJ, Streightoff F.** Increased synthesis of p-aminobenzoic acid associated with the development of sulfonamide resistance in *Staphylococcus aureus*. *Science* 1943;97:265–267.
- 614 17. **Huovinen P, Sundström L, Swedberg G, Sköld O.** Trimethoprim and sulfonamide resistance. *Antimicrob Agents Chemother* 1995;39:279–289.
- 616 18. **Flensburg J, Sköld O.** Massive overproduction of dihydrofolate reductase in bacteria as a response to the use of trimethoprim. *Eur J Biochem* 1987;162:473–476.
- 618 19. **Shin HW, Lim J, Kim S, Kim J, Kwon GC, et al.** Characterization of trimethoprim-sulfamethoxazole resistance genes and their relatedness to class 1 integron and insertion sequence common region in gram-negative bacilli. *J Microbiol Biotechnol* 2015;25:137–142.
- 620 20. **Rådström P, Swedberg G, Sköld O.** Genetic analyses of sulfonamide resistance and its dissemination in gram-negative bacteria illustrate new aspects of R plasmid evolution. *Antimicrob Agents Chemother* 1991;35:1840–1848.
- 622 21. **Perreten V, Boerlin P.** A New Sulfonamide Resistance Gene (sul3) in *Escherichia coli* Is Widespread in the Pig Population of Switzerland. *Antimicrob Agents Chemother* 2003;47:1169–1172.
- 626 22. **Tagg KA, Francois Watkins L, Moore MD, Bennett C, Joung YJ, et al.** Novel trimethoprim resistance gene dfrA34 identified in *Salmonella Heidelberg* in the USA. *J Antimicrob Chemother* 2019;74:38–41.
- 628 23. **White PA, Rawlinson WD.** Current status of the aadA and dfr gene cassette families. *J Antimicrob Chemother* 2001;47:495–496.
- 630



- 632 24. **Toulouse JL, Edens TJ, Alejaldre L, Manges AR, Pelletier JN.** Integron-Associated DfrB4, a  
Previously Uncharacterized Member of the Trimethoprim-Resistant Dihydrofolate Reductase B  
634 *Chemother*;61. Epub ahead of print 24 April 2017. DOI: 10.1128/AAC.02665-16.
- 636 25. **Sánchez-Osuna M, Cortés P, Barbé J, Erill I.** Origin of the Mobile Di-Hydro-Pterate Synthase  
Gene Determining Sulfonamide Resistance in Clinical Isolates. *Frontiers in Microbiology*;9. Epub  
ahead of print January 2019. DOI: 10.3389/fmicb.2018.03332.
- 638 26. **Taly J-F, Magis C, Bussotti G, Chang J-M, Di Tommaso P, et al.** Using the T-Coffee package to  
build multiple sequence alignments of protein, RNA, DNA sequences and 3D structures. *Nat*  
640 *Protoc* 2011;6:1669–1682.
- 642 27. **O’Leary NA, Wright MW, Brister JR, Ciuffo S, Haddad D, et al.** Reference sequence (RefSeq)  
database at NCBI: current status, taxonomic expansion, and functional annotation. *Nucleic Acids*  
*Res* 2016;44:D733–745.
- 644 28. **Benson DA, Cavanaugh M, Clark K, Karsch-Mizrachi I, Lipman DJ, et al.** GenBank. *Nucleic Acids*  
*Res* 2017;45:D37–D42.
- 646 29. **Holm L, Sander C.** Removing near-neighbour redundancy from large protein sequence  
collections. *Bioinformatics* 1998;14:423–429.
- 648 30. **Altschul SF, Madden TL, Schaffer AA, Zhang J, Zhang Z, et al.** Gapped BLAST and PSI-BLAST: a  
new generation of protein database search programs. *Nucleic acids research* 1997;25:3389–402.
- 650 31. **Kaushik S, Mutt E, Chellappan A, Sankaran S, Srinivasan N, et al.** Improved Detection of  
Remote Homologues Using Cascade PSI-BLAST: Influence of Neighbouring Protein Families on  
652 Sequence Coverage. *PLoS One*;8. Epub ahead of print 20 February 2013. DOI:  
10.1371/journal.pone.0056449.
- 654 32. **Brum JR, Ignacio-Espinoza JC, Roux S, Doucier G, Acinas SG, et al.** Patterns and ecological  
drivers of ocean viral communities. *Science*;348. Epub ahead of print 22 May 2015. DOI:  
656 10.1126/science.1261498.
- 658 33. **Chen Q, Zobel J, Verspoor K.** Benchmarks for measurement of duplicate detection methods in  
nucleotide databases. *Database (Oxford)*. Epub ahead of print 8 January 2017. DOI:  
10.1093/database/baw164.
- 660 34. **Wallace IM, O’Sullivan O, Higgins DG, Notredame C.** M-Coffee: combining multiple sequence  
alignment methods with T-Coffee. *Nucleic Acids Res* 2006;34:1692–1699.
- 662 35. **Castresana J.** Selection of Conserved Blocks from Multiple Alignments for Their Use in  
Phylogenetic Analysis. *Molecular Biology and Evolution* 2000;17:540–552.
- 664 36. **Ronquist F, Huelsenbeck JP.** MrBayes 3: Bayesian phylogenetic inference under mixed models.  
*Bioinformatics (Oxford, England)* 2003;19:1572–4.

- 666 37. **Erill I.** Dispersal and regulation of an adaptive mutagenesis cassette in the bacteria domain.  
668 *Nucleic Acids Research* 2006;34:66–77.
- 668 38. **Rambaut A, Drummond AJ, Xie D, Baele G, Suchard MA.** Posterior Summarization in Bayesian  
670 Phylogenetics Using Tracer 1.7. *Syst Biol* 2018;67:901–904.
- 670 39. **Yu G, Smith DK, Zhu H, Guan Y, Lam TT-Y.** ggtree: an r package for visualization and annotation  
672 of phylogenetic trees with their covariates and other associated data. *Methods in Ecology and  
Evolution* 2017;8:28–36.
- 674 40. **Pagel M, Meade A, Barker D.** Bayesian estimation of ancestral character states on phylogenies.  
674 *Syst Biol* 2004;53:673–684.
- 676 41. **Mayola A, Irazoki O, Martínez IA, Petrov D, Menolascina F, et al.** RecA protein plays a role in  
676 the chemotactic response and chemoreceptor clustering of *Salmonella enterica*. *PLoS ONE*  
2014;9:e105578.
- 678 42. **Clinical and Laboratory Standards Institute.** *Methods for dilution antimicrobial susceptibility  
680 tests for bacteria that grow aerobically - Approved Standard*. Sixth edition. Wayne, Pa. USA:  
Clinical and Laboratory Standards Institute; 2003.
- 682 43. **Fling ME, Richards C.** The nucleotide sequence of the trimethoprim-resistant dihydrofolate  
682 reductase gene harbored by Tn7. *Nucleic Acids Res* 1983;11:5147–5158.
- 684 44. **Smith DR, Calvo JM.** Nucleotide sequence of the E coli gene coding for dihydrofolate reductase.  
684 *Nucleic Acids Res* 1980;8:2255–2274.
- 686 45. **Eddy SR.** Accelerated Profile HMM Searches. *PLOS Comput Biol* 2011;7:e1002195.
- 686 46. **Faltyn M, Alcock B, McArthur A.** Evolution and Nomenclature of the Trimethoprim Resistant  
688 Dihydrofolate (dfr) Reductases. Epub ahead of print 10 May 2019. DOI:  
10.20944/preprints201905.0137.v1.
- 690 47. **van Hoek AHAM, Mevius D, Guerra B, Mullany P, Roberts AP, et al.** Acquired Antibiotic  
690 Resistance Genes: An Overview. *Front Microbiol*;2. Epub ahead of print 28 September 2011. DOI:  
10.3389/fmicb.2011.00203.
- 692 48. **Villa L, Visca P, Tosini F, Pezzella C, Carattoli A.** Composite integron array generated by insertion  
692 of an ORF341-type integron within a Tn21-like element. *Microb Drug Resist* 2002;8:1–8.
- 694 49. **Grape M, Farra A, Kronvall G, Sundström L.** Integrons and gene cassettes in clinical isolates of  
694 co-trimoxazole-resistant Gram-negative bacteria. *Clin Microbiol Infect* 2005;11:185–192.
- 696 50. **Ho PL, Wong RC, Chow KH, Que TL.** Distribution of integron-associated trimethoprim-  
696 sulfamethoxazole resistance determinants among *Escherichia coli* from humans and food-  
698 producing animals. *Lett Appl Microbiol* 2009;49:627–634.

51. **Volz C, Ramoni J, Beisken S, Galata V, Keller A, et al.** Clinical Resistome Screening of 1,110  
700 *Escherichia coli* Isolates Efficiently Recovers Diagnostically Relevant Antibiotic Resistance  
Biomarkers and Potential Novel Resistance Mechanisms. *Front Microbiol* 2019;10:1671.
- 702 52. **Kumar S, Stecher G, Suleski M, Hedges SB.** TimeTree: A Resource for Timelines, Timetrees, and  
Divergence Times. *Mol Biol Evol* 2017;34:1812–1819.
- 704 53. **Sigala J-C, Suárez BP, Lara AR, Borgne SL, Bustos P, et al.** Genomic and physiological  
706 characterization of a laboratory-isolated *Acinetobacter schindleri* ACE strain that quickly and  
efficiently catabolizes acetate. *Microbiology (Reading, Engl)* 2017;163:1052–1064.
- 708 54. **Falagas ME, Vardakas KZ, Roussos NS.** Trimethoprim/sulfamethoxazole for *Acinetobacter* spp.:  
A review of current microbiological and clinical evidence. *Int J Antimicrob Agents* 2015;46:231–  
241.
- 710 55. **Pérez-Varela M, Corral J, Aranda J, Barbé J.** Roles of Efflux Pumps from Different Superfamilies  
712 in the Surface-Associated Motility and Virulence of *Acinetobacter baumannii* ATCC 17978.  
*Antimicrob Agents Chemother*;63. Epub ahead of print 2019. DOI: 10.1128/AAC.02190-18.
- 714 56. **Vickers AA, Potter NJ, Fishwick CWG, Chopra I, O'Neill AJ.** Analysis of mutational resistance to  
trimethoprim in *Staphylococcus aureus* by genetic and structural modelling techniques. *J*  
*Antimicrob Chemother* 2009;63:1112–1117.
- 716 57. **Watson M, Liu J-W, Ollis D.** Directed evolution of trimethoprim resistance in *Escherichia coli*.  
*FEBS J* 2007;274:2661–2671.
- 718 58. **Toprak E, Veres A, Michel J-B, Chait R, Hartl DL, et al.** Evolutionary paths to antibiotic resistance  
under dynamically sustained drug selection. *Nat Genet* 2012;44:101–105.
- 720 59. **Swedberg G, Fermér C, Sköld O.** Point Mutations in the Dihydropteroate Synthase Gene Causing  
722 Sulfonamide Resistance. In: Ayling JE, Nair MG, Baugh CM (editors). *Chemistry and Biology of*  
*Pteridines and Folates*. Boston, MA: Springer US. pp. 555–558.
- 724 60. **Griffith EC, Wallace MJ, Wu Y, Kumar G, Gajewski S, et al.** The Structural and Functional Basis  
for Recurring Sulfa Drug Resistance Mutations in *Staphylococcus aureus* Dihydropteroate  
Synthase. *Front Microbiol*;9. Epub ahead of print 17 July 2018. DOI: 10.3389/fmicb.2018.01369.
- 726 61. **Palmer AC, Kishony R.** Opposing effects of target overexpression reveal drug mechanisms. *Nat*  
*Commun* 2014;5:4296.
- 728 62. **Dale GE, Broger C, Hartman PG, Langen H, Page MG, et al.** Characterization of the gene for the  
730 chromosomal dihydrofolate reductase (DHFR) of *Staphylococcus epidermidis* ATCC 14990: the  
origin of the trimethoprim-resistant S1 DHFR from *Staphylococcus aureus*? *J Bacteriol*  
1995;177:2965–2970.
- 732 63. **Coque TM, Singh KV, Weinstock GM, Murray BE.** Characterization of dihydrofolate reductase  
734 genes from trimethoprim-susceptible and trimethoprim-resistant strains of *Enterococcus*  
*faecalis*. *Antimicrob Agents Chemother* 1999;43:141–147.

- 736 64. **Barrow EW, Bourne PC, Barrow WW.** Functional cloning of *Bacillus anthracis* dihydrofolate reductase and confirmation of natural resistance to trimethoprim. *Antimicrob Agents Chemother* 2004;48:4643–4649.
- 738 65. **Parkhill J, Dougan G, James KD, Thomson NR, Pickard D, et al.** Complete genome sequence of a multiple drug resistant *Salmonella enterica* serovar Typhi CT18. *Nature* 2001;413:848–852.
- 740 66. **Ahmed SA, Awosika J, Baldwin C, Bishop-Lilly KA, Biswas B, et al.** Genomic Comparison of *Escherichia coli* O104:H4 Isolates from 2009 and 2011 Reveals Plasmid, and Prophage  
742 Heterogeneity, Including Shiga Toxin Encoding Phage stx2. *PLOS ONE* 2012;7:e48228.
- 744 67. **Kim M, Kim S, Ryu S.** Complete Genome Sequence of Bacteriophage SSU5 Specific for *Salmonella enterica* serovar Typhimurium Rough Strains. *Journal of Virology* 2012;86:10894–10894.
- 746 68. **Octavia S, Sara J, Lan R.** Characterization of a large novel phage-like plasmid in *Salmonella enterica* serovar Typhimurium. *FEMS Microbiol Lett*;362. Epub ahead of print 1 April 2015. DOI:  
748 10.1093/femsle/fnv044.
- 750 69. **Asare PT, Jeong T-Y, Ryu S, Klumpp J, Loessner MJ, et al.** Putative type 1 thymidylate synthase and dihydrofolate reductase as signature genes of a novel bastille-like group of phages in the subfamily Spounavirinae. *BMC Genomics* 2015;16:582.
- 752 70. **Muniesa M, Colomer-Lluch M, Jofre J.** Could bacteriophages transfer antibiotic resistance genes from environmental bacteria to human-body associated bacterial populations? *Mob Genet Elements*;3. Epub ahead of print 1 July 2013. DOI: 10.4161/mge.25847.
- 754 71. **Balcazar JL.** Bacteriophages as Vehicles for Antibiotic Resistance Genes in the Environment. *PLoS Pathog*;10. Epub ahead of print 31 July 2014. DOI: 10.1371/journal.ppat.1004219.
- 756 72. **Enault F, Briet A, Bouteille L, Roux S, Sullivan MB, et al.** Phages rarely encode antibiotic resistance genes: a cautionary tale for virome analyses. *ISME J* 2017;11:237–247.
- 760 73. **Bhattacharya B, Giri N, Mitra M, Gupta SKD.** Cloning, characterization and expression analysis of nucleotide metabolism-related genes of mycobacteriophage L5. *FEMS Microbiol Lett* 2008;280:64–72.
- 762 74. **Wittmann J, Gartemann K-H, Eichenlaub R, Dreiseikelmann B.** Genomic and molecular analysis of phage CMP1 from *Clavibacter michiganensis* subspecies *michiganensis*. *Bacteriophage*  
764 2011;1:6–14.
- 766 75. **Huang S, Zhang S, Jiao N, Chen F.** Comparative Genomic and Phylogenomic Analyses Reveal a Conserved Core Genome Shared by Estuarine and Oceanic Cyanopodoviruses. *PLOS ONE* 2015;10:e0142962.
- 768 76. **Kozloff LM, Lute M, Crosby LK.** Bacteriophage T4 virion baseplate thymidylate synthetase and dihydrofolate reductase. *J Virol* 1977;23:637–644.

770 77. Peters DL, McCutcheon JG, Stothard P, Dennis JJ. Novel *Stenotrophomonas maltophilia*  
temperate phage DLP4 is capable of lysogenic conversion. *BMC Genomics* 2019;20:300.

772

## 10. Data bibliography

774 **Data 1** – The compiled list of accession numbers and references of experimentally validated *dfrA* genes is available in Table  
S1.

776 **Data 2** – Input files (JSON, TXT and FASTA) and BLAST database for Python scripts used in data collection and analysis (DOI:  
10.6084/m9.figshare.12156891.v1).

778 **Data 3** – Release of the GitHub repository containing the Python scripts used for data collection and analysis (DOI:  
10.5281/zenodo.3760352).

780 **Data 4** – The accession numbers of chromosomal and mobile *DfrA*/*FolA* sequences used in this work are provided in Table  
S5.

782 **Data 5** – The accession numbers of mobile element complete assemblies and their *DfrA*/*Sul*-encoded proteins used for  
%GC analysis are provided in Table S8.

784

## 11. Figures and tables

786 **Figure 1** – Consensus tree of DHFR protein sequences. Branch support values are provided as Bayesian posterior  
788 probabilities estimated after four independent runs of 20,000,000 generations. Support values are only shown for  
branches with posterior probability values higher than 0.8. For chromosomal DHFR, the species name is displayed. Mobile  
790 DHFRs are denoted by their established *dfrA* name or by their NCBI GenBank accession numbers. Reported *dfrA* genes  
deemed redundant (>90% identity) are listed next to the corresponding non-redundant taxon included in the analysis. Next  
792 to each tip label, colored boxes designate (orange) trimethoprim resistant and (purple) sensitive DHFR. Numbers between  
brackets indicate the %GC content of the sequence for the gene encoding the DHFR. Tip label coloring denotes: (green)  
794 previously reported and (blue) novel DHFRs. Bold label text indicates that resistance has been experimentally assessed in  
this work. DHFR variants marked with an asterisk (\*) are encoded in megaplasms (> 400 kbp). The internal ring shows the  
796 %GC of the gene encoding the DHFR in yellow-red color scale, while the external ring displays the ratio between the %GC  
content of the genome harboring the DHFR gene and the %GC content of the gene. Dotted lines from the inner ring to tip  
798 labels denote genes discussed in the text. Reconstructed mobile/chromosomal states are displayed on ancestral nodes as  
pink/black pie charts.

**Figure 2** – Correlation between the %GC content of mobile *dfrA* (red circles) and *sul* (green squares) genes and that of their  
800 host genome. Large open circles/squares denote representatives of clusters of redundant sequences (identity >90%), and  
*dfrA* genes from **Figure 1** *Clade 1* and *Clade 2* are marked with an additional corona. A 0.75% jitter to both x- and y-axis  
802 values has been applied for visualization purposes. The red line shows the linear regression for representative *dfrA* gene  
values. The Pearson R<sup>2</sup> coefficient is superimposed. Vertical background bars in the top panel designate *DfrA* sequences  
804 harbored by MGEs identified in *E. coli* and *K. pneumoniae* isolates, which are heavily overrepresented in the dataset.  
Sequences from clusters with more than 100 sequences (represented by *dfrA12*, *dfrA5* and *dfrA1*) are shown with specific  
806 markers, and highlighted by horizontal background bars. The number of mobile genetic elements (MGEs) identified as  
harboring *dfrA* genes, before and after filtering *DfrA* sequence identity (>90%), is shown in the bottom panel.

808 **Figure 3** – Schematic representation of the two proposed evolutionary processes, based on the results presented in **Figure**  
**1**, **Figure 2** and **Table 1**, leading to the dissemination of trimethoprim resistance determinants. (Left panel) Upon the  
810 introduction of trimethoprim, mobilization events involving preexisting resistant chromosomal *folA* genes can be favorably  
selected. (Right panel) Following the introduction of trimethoprim, mobilization events involving *folA* genes with novel

812 mutations that confer resistance to this chemotherapeutic agent may be selected for and disseminated among closely  
related bacteria.

814 **Table 1** – Minimum inhibitory concentrations (MICs) of trimethoprim for wild-type *Escherichia coli* K-12 (CGSC5073) and  
derivatives carrying different versions of *dfr/foIA* or the control empty vector. Values are representative of four  
816 independent replicates.

| Strain                                                                   | Mobile / Chromosomal | Nucleotide accession | Cloned Protein ID | Trimethoprim (mg/L) |
|--------------------------------------------------------------------------|----------------------|----------------------|-------------------|---------------------|
| <i>E. coli</i> CGSC5073                                                  | -                    | -                    | -                 | 0.25                |
| <i>E. coli</i> pUA1108                                                   | -                    | -                    | -                 | 0.25                |
| <i>E. coli</i> pUA1108:: <i>foIA E. coli</i>                             | C                    | NC_000913            | WP_000624375      | 4                   |
| <i>E. coli</i> pUA1108:: <i>dfrA1</i>                                    | M                    | NC_002525            | WP_000777554      | >512                |
| <i>E. coli</i> pUA1108:: <i>foIA Flavobacterium branchiophilum</i>       | C                    | NC_016001            | WP_014083133      | 256                 |
| <i>E. coli</i> pUA1108:: <i>foIA Flavobacterium faecale</i>              | C                    | NZ_CP020918          | WP_108740183      | >512                |
| <i>E. coli</i> pUA1108:: <i>dfrA38 Acinetobacter baumannii</i>           | M                    | CP021344             | KMV08986          | 256                 |
| <i>E. coli</i> pUA1108:: <i>foIA Acinetobacter schindleri</i>            | C                    | NZ_CP025618          | WP_004813248      | 0.25                |
| <i>E. coli</i> pUA1108:: <i>dfrA39 Acinetobacter baumannii</i>           | M                    | NZ_CP021785          | WP_031380727      | 512                 |
| <i>E. coli</i> pUA1108:: <i>dfrA40 Acinetobacter baumannii</i>           | M                    | NZ_JEVW01000010      | WP_034702334      | 128                 |
| <i>E. coli</i> pUA1108:: <i>dfrA41 Acinetobacter defluvii</i>            | M                    | NZ_CP029396          | WP_004729503      | >512                |
| <i>E. coli</i> pUA1108:: <i>foIA Fluviicola taffensis</i>                | C                    | NC_015321            | WP_013685591      | >512                |
| <i>E. coli</i> pUA1108:: <i>foIA Candidatus Fluviicola riflensis</i>     | C                    | CP022585             | ASS49886          | >512                |
| <i>E. coli</i> pUA1108:: <i>foIA Alcanivorax pacificus</i>               | C                    | NZ_CP004387          | WP_008736147      | 32                  |
| <i>E. coli</i> pUA1108:: <i>foIA Alcanivorax borkumensis</i>             | C                    | AM286690             | CAL17791          | 16                  |
| <i>E. coli</i> pUA1108:: <i>foIA Bacillus mobilis</i>                    | C                    | NZ_CP031443          | WP_000637217      | >512                |
| <i>E. coli</i> pUA1108:: <i>foIA Ralstonia solanacearum</i>              | C                    | NC_003295            | WP_011000898      | 0.5                 |
| <i>E. coli</i> pUA1108:: <i>foIA</i> blood disease bacterium A2-HR MARDI | M                    | CP019912             | AQW32254          | 1                   |
| <i>E. coli</i> pUA1108:: <i>foIA E. coli</i> O104:H4                     | M                    | CP003298             | AFS59762          | 2                   |

818

## 12. Supplementary material

### 820 12.1 Supplementary Figures

822 **Figure S1** – Multiple sequence alignment including all reported mobile DHFR proteins. DfrB protein sequences are highlighted in yellow.

824 **Figure S2** – Pairwise percent amino acid identity and %GC difference between aligned representative DfrA protein sequences harbored by mobile genetic elements of *E. coli* and *K. pneumoniae*.

826 **Figure S3** – Unrooted Neighbor-Joining tree of DHFR protein sequences. Branch support values are provided as the total number of 1000 bootstrap pseudo-replicates in which the branching was observed. Support values are only shown for branches with at least 75% bootstrap support. The DfrA20, DfrA38, *Fluviicola* and *Flavobacterium* DHFR protein sequences are highlighted.

830 **Figure S4** – Schematic representation of the genetic environment of mobile DHFR genes, their putative chromosomal origin and one representative complete genome assembly for each species within the corresponding genus. Arrow boxes indicate coding regions (discontinued arrows pinpoint pseudogenes). When available, gene names or NOG identifiers are provided and color coded.

834 **Figure S5** – Graphical overview of *Acinetobacter defluvii* plasmid pOXA58\_010030 with *dfrA41* (red arrow box) and other resistance determinants represented as blue arrow boxes. This figure was constructed using SnapGene Viewer.

### 836 12.2 Supplementary Tables

**Table S1** – List of *dfrA* genes reported in the literature.

838 **Table S2** – Proteins mapping to replicative functions of mobile genetic elements identified via HMMER search with reference PFAM domains in MGEs containing putative *dfrA* genes.

840 **Table S3** – List of oligonucleotides used in this work.

842 **Table S4** – Table S4 - HMMER mapping between the product of *dfrA* genes and PFAM models corresponding to DfrA and DfrB.

844 **Table S5** – List of accession numbers for chromosomal and mobile sequences containing DfrA/FolA-encoding genes used in this work. The species (chromosomal) or *dfrA* index (mobile), the nucleotide and protein accession numbers are provided.

846 **Table S6** – Protein identity values between a set of non-redundant (<90% identity) previously reported DHFR proteins resulting from pairwise alignments using the Needleman-Wunsch algorithm.

**Table S7** – %GC content for previously reported *dfrA* genes and their host genome.

848 **Table S8** – Analysis of %GC content among antibiotic resistance genes (ARG), the mobile genetic elements (MGE) encoding them and the species harboring the MGE. The table lists the %GC content of *dfrA/sul* homologs encoded in complete mobile element assemblies, %GC content of mobile elements and that of the host genome. Accession numbers for complete assemblies, Sul and DfrA proteins are provided.

852 **Table S9** – Non-redundant DfrA and Sul sequences (pairwise percent identity lower than 90%).

854 **Table S10** – Pairwise percent amino acid identity between aligned representative mobile DfrA protein sequences and the sequence of the chromosomal Fola protein for the species harboring the mobile genetic element encoding the *dfrA* gene.

856 **Table S11** – Pairwise percent amino acid identity and %GC difference between aligned representative DfrA protein sequences harbored by mobile genetic elements of *E. coli* and *K. pneumoniae*.

858 **Table S12** – Maximum-likelihood estimates for ancestral states in the phylogenetic tree of *FoIA/DfrA* homologs reported in Figure 1.

860 **Table S13** – Pair-wise percent identities among all species in the genera under study and with the putative chromosomal origin for different *dfrA* genes. The results (p-value) of the Mann-Whitney U test comparing intra-genus pair-wise identities versus the chromosomal origin are reported for each *dfrA* gene.

862 **Table S14** – Percent identity values between sequences of novel mobile DHFR homologs reported here and all previously reported DHFR proteins. Percent identity values are derived from pairwise alignments using the Needleman-Wunsch algorithm.

864 **Table S15** – Comparison of %GC content between *dfrA* genes and putative chromosomal *foIA* origins. The average coding %GC content of donor genomes is also provided.

866 **Table S16** – Protein sequence identity values from pairwise alignments among cryptic plasmid- and phage-encoded DHFR homologs.



Reported DHFR

Novel DHFR

Trimethoprim phenotype

Resistant

Sensitive

Ancestral state

Chromosomal

Mobile

folA/dfrA

%GC

70%

60%

50%

40%

30%

Genome %GC vs.

folA/dfrA %GC

1.6

1.4

1.2

1.0

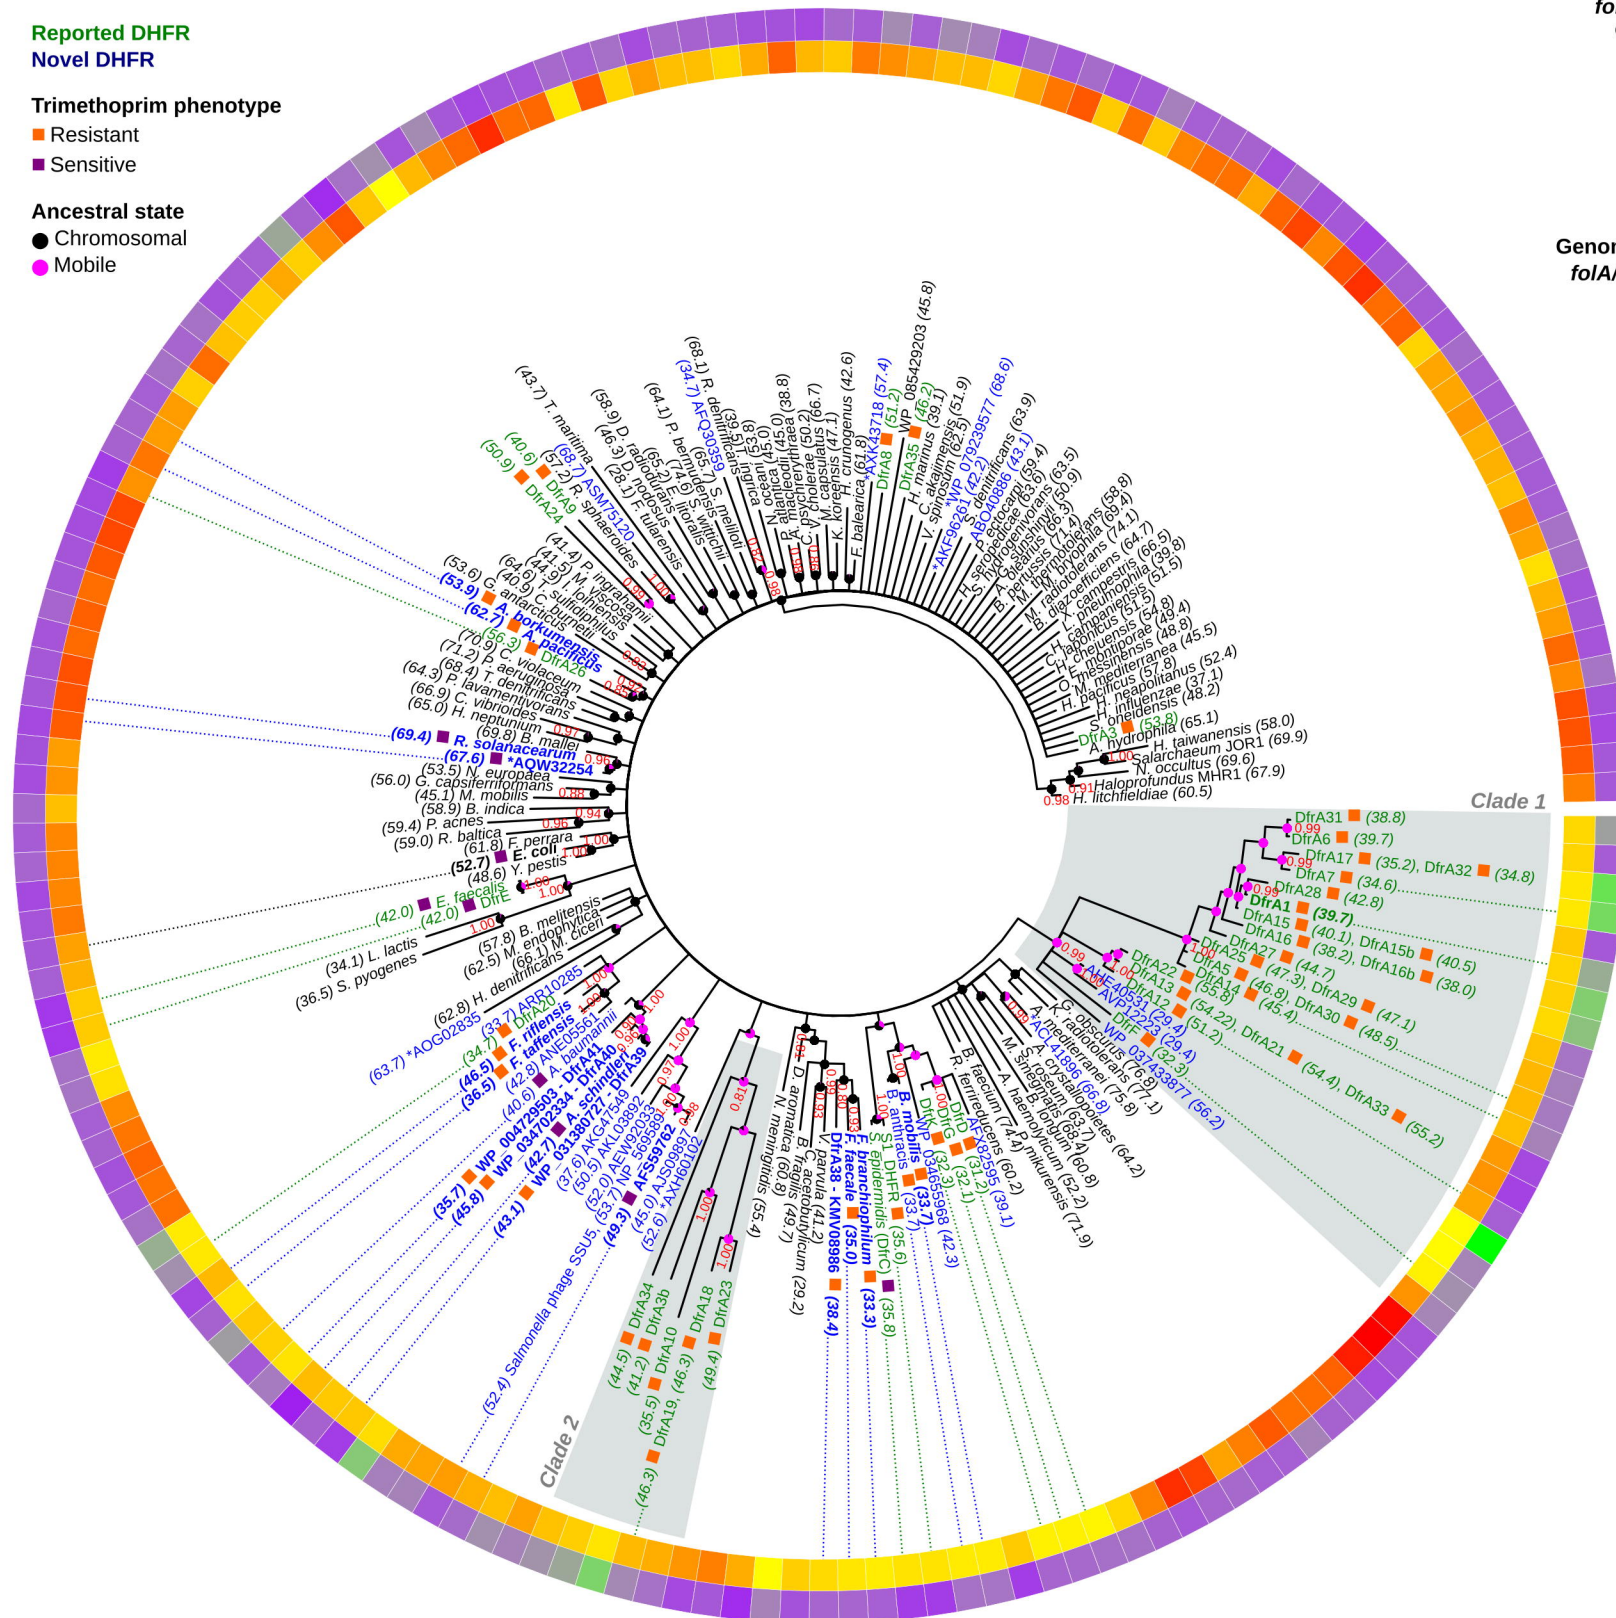

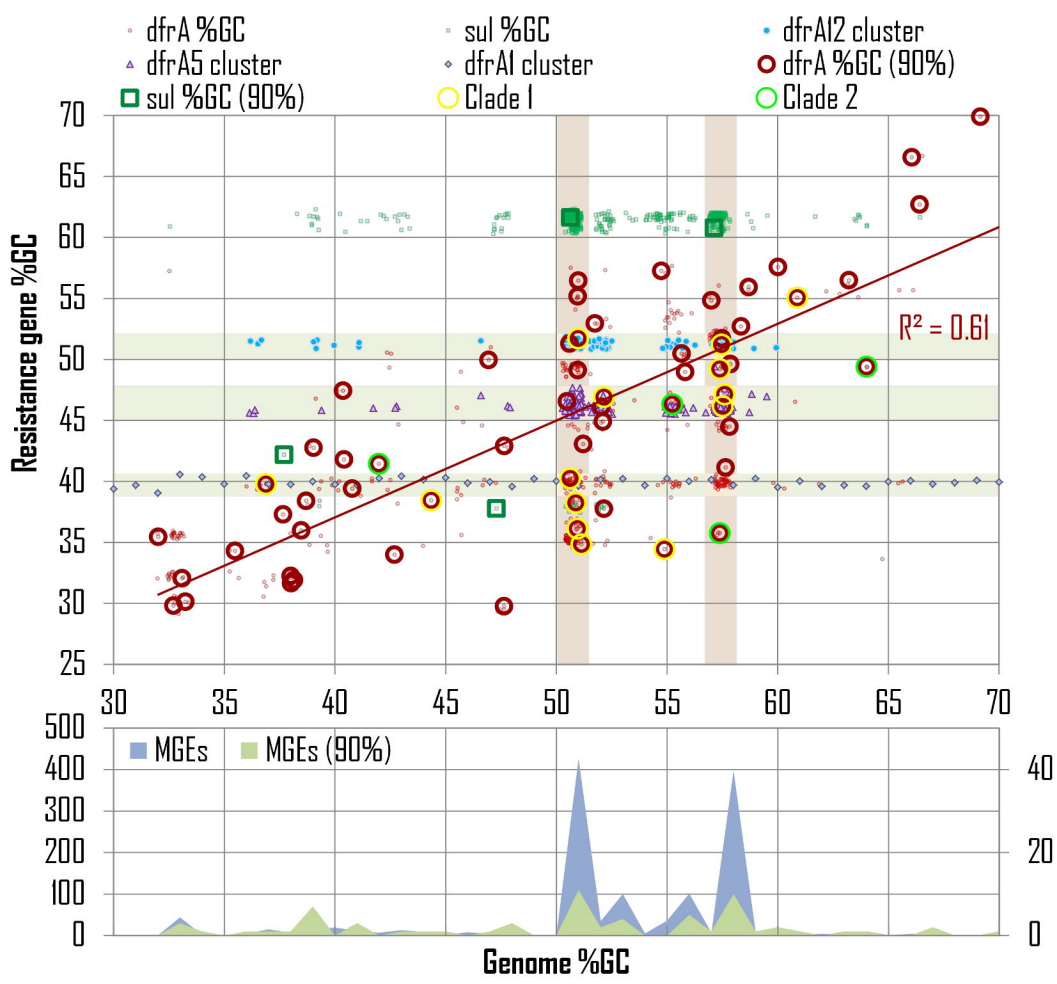

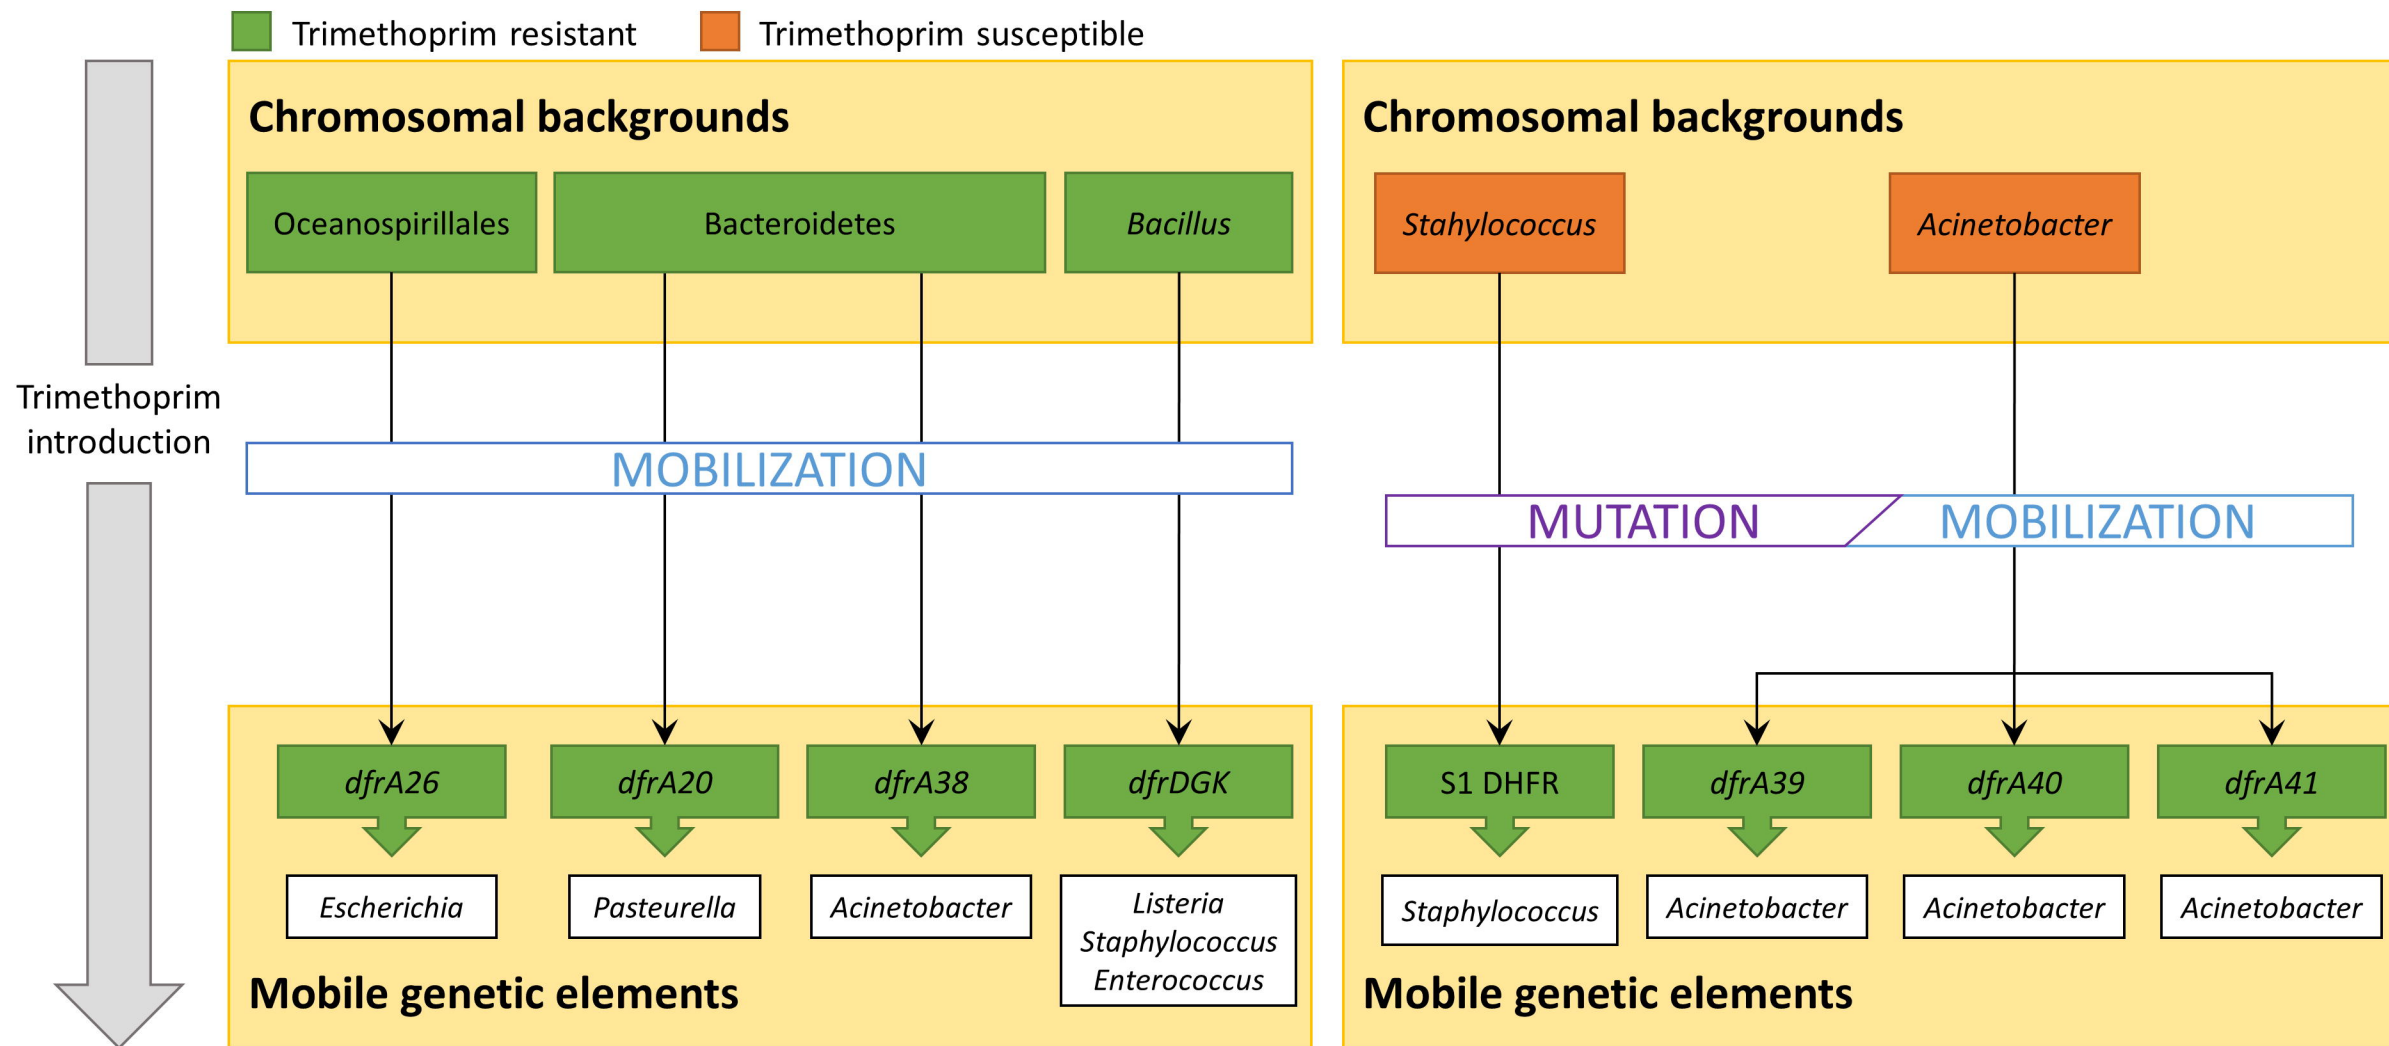

Source: https://www.biorxiv.org/content/10.1101/2020.07.31.230557v1.full.pdf
